# Supplementary material for: Reciprocal interaction between mesenchymal stem cells and transit amplifying cells regulates tissue homeostasis
Source: eLife. 2021 Jan 22;10:e59459. doi: 10.7554/eLife.59459 (PMC7822593; doi:10.7554/eLife.59459)
Supplement: Figure 3—figure supplement 1—source data 1. [file elife-59459-fig3-figsupp1-data1.xlsx]

## Sheet: Sheet1
Ki67 positive cells in the mesenchyme/DAPI positive cells in the mesenchyme
Igf1rfl/fl	Axin2-CreERT2;Igf1rfl/fl
0.163	0.154
0.175	0.167
0.201	0.159
0.181	0.146
Ki67 positive cells in the epithelium/DAPI positive cells in the epithelium
Igf1rfl/fl	Axin2-CreERT2;Igf1rfl/fl
0.189	0.203
0.194	0.185
0.201	0.168
0.172	0.136
