# Supplementary material for: Reciprocal interaction between mesenchymal stem cells and transit amplifying cells regulates tissue homeostasis
Source: eLife. 2021 Jan 22;10:e59459. doi: 10.7554/eLife.59459 (PMC7822593; doi:10.7554/eLife.59459)
Supplement: Figure 3—source data 1. [file elife-59459-fig3-data1.xlsx]

## Sheet: Sheet1
Ki67 positive cells/DAPI positive cells
Igf1rfl/fl	Axin2-CreERT2;Igf1rfl/fl
0.183	0.099
0.172	0.106
0.211	0.116
0.187	0.101
