# Supplementary material for: Reciprocal interaction between mesenchymal stem cells and transit amplifying cells regulates tissue homeostasis
Source: eLife. 2021 Jan 22;10:e59459. doi: 10.7554/eLife.59459 (PMC7822593; doi:10.7554/eLife.59459)
Supplement: Figure 4—figure supplement 2—source data 1. [file elife-59459-fig4-figsupp2-data1.xlsx]

## Sheet: Sheet1
Ki67 positive cells/DAPI positive cells
Wntlessfl/fl	Dmp1-Cre;Wntlessfl/fl
0.179	0.201
0.193	0.184
0.202	0.178
0.188	0.191
Gli1 positive cells/DAPI positive cells
Wntlessfl/fl	Dmp1-Cre;Wntlessfl/fl
0.292	0.252
0.241	0.246
0.274	0.265
0.261	0.233
