# Supplementary material for: Reciprocal interaction between mesenchymal stem cells and transit amplifying cells regulates tissue homeostasis
Source: eLife. 2021 Jan 22;10:e59459. doi: 10.7554/eLife.59459 (PMC7822593; doi:10.7554/eLife.59459)
Supplement: Figure 5—figure supplement 2—source data 1. [file elife-59459-fig5-figsupp2-data1.xlsx]

## Sheet: Sheet1
EdU positive cells/DAPI positive cells
Wnt5afl/fl	Axin2-CreERT2;Wnt5afl/fl
0.189	0.052
0.178	0.069
0.156	0.082
0.149	0.078
