# Supplementary material for: Reciprocal interaction between mesenchymal stem cells and transit amplifying cells regulates tissue homeostasis
Source: eLife. 2021 Jan 22;10:e59459. doi: 10.7554/eLife.59459 (PMC7822593; doi:10.7554/eLife.59459)
Supplement: Figure 5—source data 1. [file elife-59459-fig5-data1.xlsx]

## Sheet: Sheet1
Ki67 positive cells/DAPI positive cells
Wnt5afl/fl	Axin2-CreERT2;Wnt5afl/fl
0.196	0.185
0.182	0.178
0.204	0.147
0.185	0.165
Gli1+ positive cells/DAPI positive cells
Wnt5afl/fl	Axin2-CreERT2;Wnt5afl/fl
0.301	0.115
0.272	0.127
0.283	0.137
0.241	0.099
