# Supplementary material for: Reciprocal interaction between mesenchymal stem cells and transit amplifying cells regulates tissue homeostasis
Source: eLife. 2021 Jan 22;10:e59459. doi: 10.7554/eLife.59459 (PMC7822593; doi:10.7554/eLife.59459)
Supplement: Figure 6—figure supplement 1—source data 1. [file elife-59459-fig6-figsupp1-data1.xlsx]

## Sheet: Sheet1
EdU positive cells/DAPI positive cells
Ror2fl/fl	Gli1-CreERT2;Ror2fl/fl
0.156	0.078
0.146	0.069
0.179	0.052
0.152	0.064
